# Supplementary material for: All-solid-state flexible asymmetric micro supercapacitors based on cobalt hydroxide and reduced graphene oxide electrodes
Source: Royal Society of Chemistry journal article supplement (doi:10.1039/c6ra06034j), 2016-01-01
Supplement: c6ra06034j1.pdf [file c6ra06034j1.pdf]

## SUPPORTING INFORMATION

# All-solid-state Flexible Asymmetric Micro Supercapacitors Based on Cobalt Hydroxide and Reduced Graphene Oxide Electrodes

*Su Chan Lee<sup>a,†</sup>, U.M. Patil<sup>a,†</sup>, Sun Jun Kim<sup>a</sup>, Seokhoon Ahn<sup>b</sup>, Seok-Won Kang<sup>c</sup>, Seong Chan*

*Jun<sup>a\*</sup>*

<sup>a</sup>Nano-Electro Mechanical Device Laboratory, School of Mechanical Engineering, Yonsei  
University, Seoul 120-749, South Korea

<sup>b</sup>Institute of Advanced Composite Materials, Korea Institute of Science and Technology,  
Jellabuk-do 565-905, South Korea

<sup>c</sup>Korea Railroad Research Institute, 176 Cheoldo bangmulgwan-ro, Uiwang, Gyeonggi-do  
437-757, South Korea

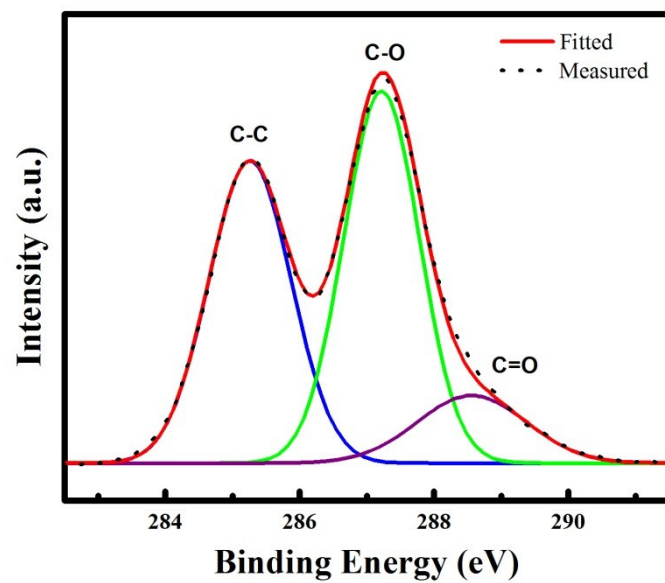

**Figure S1.** X-ray Photoelectron Spectroscopy (XPS) characteristics: high-resolution C1s spectra of GO.

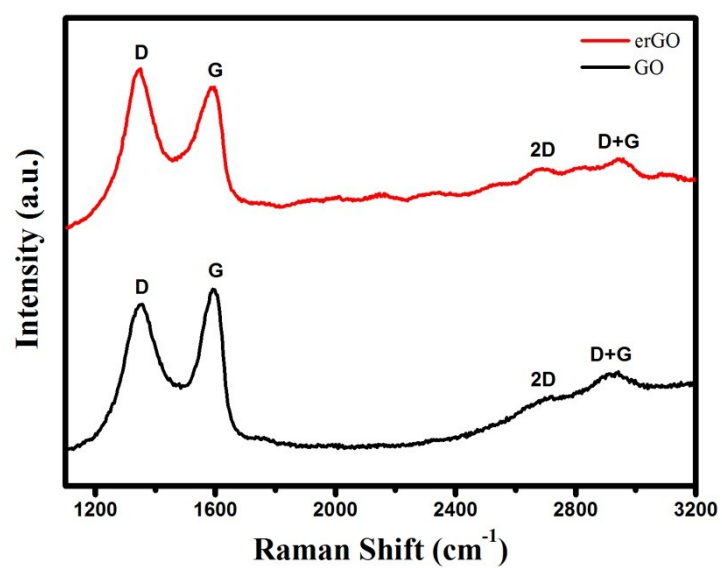

**Figure S2.** Raman spectra of electrochemically reduced graphene oxide (red) and pristine graphene oxide (black).

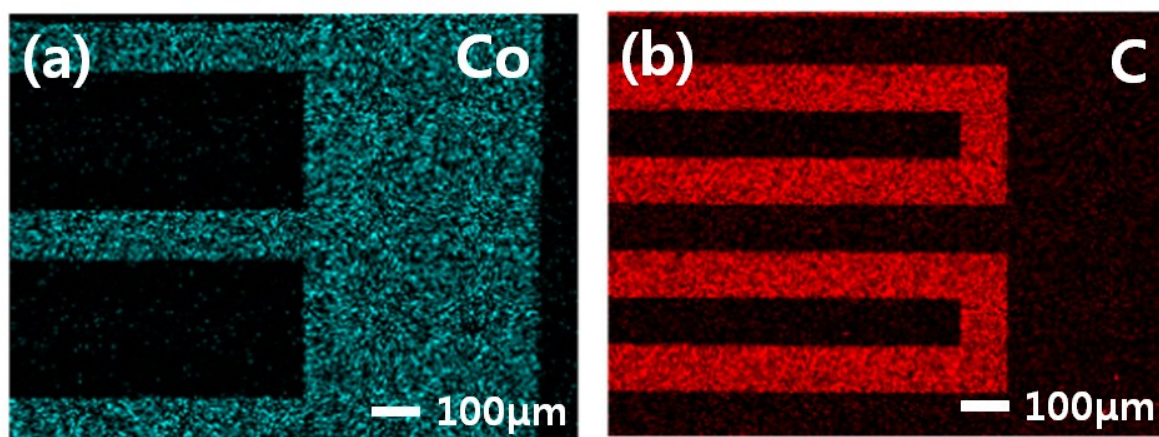

**Figure S3.** SEM-EDS images of (a)  $\text{Co}(\text{OH})_2$  (b) electrochemically reduced graphene oxide (erGO) (Only right side of electrode was coated)

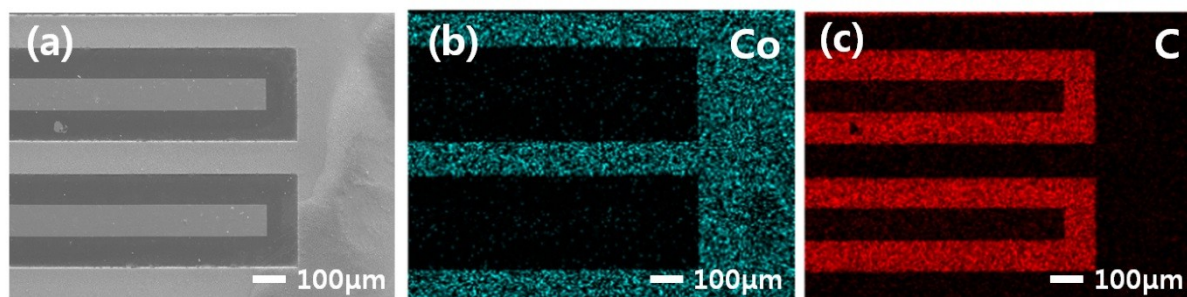

**Figure S4.** (a) SEM image of  $\text{Co(OH)}_2/\text{erGO}$  a asymmetric micro-SC. SEM-EDS images of  $\text{Co(OH)}_2/\text{erGO}$  a micro-SC (b) cobalt and (c) carbon

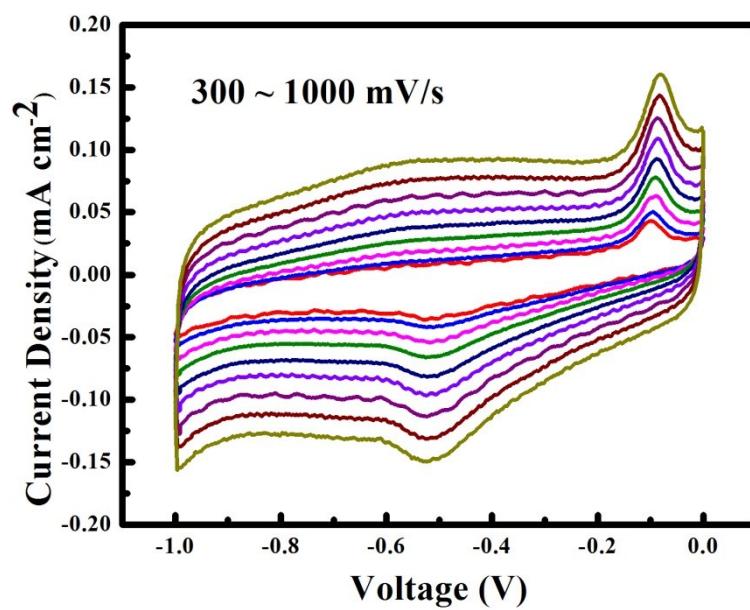

**Figure S5.** Cyclic Voltammetry curves of erGO half cell at high scan rate.

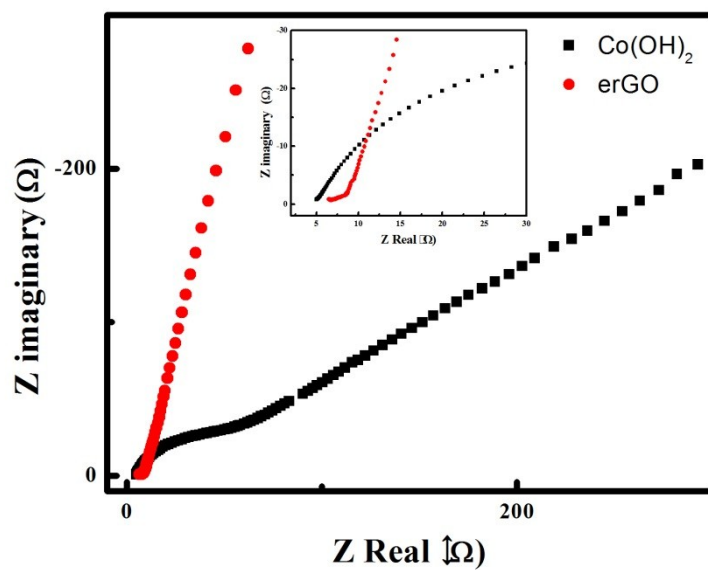

**Figure S6.** Electrochemically impedance spectroscopy within 250 kHz and 0.1 Hz frequency range of  $\text{Co}(\text{OH})_2$  and erGO half cell. Inset shows high frequency region.

| Active materials                     | Electrolyte                          | Cell type  | Specific Capacitance [Voltage]                               | Energy Density             | Power Density              | Ref  |
|--------------------------------------|--------------------------------------|------------|--------------------------------------------------------------|----------------------------|----------------------------|------|
| CoOH <sub>2</sub> -CoOH <sub>2</sub> | PVA-KOH-KI                           | Symmetric  | 10.16 mF·cm <sup>-2</sup> (0.08mA·cm <sup>-2</sup> ) [0.8V]  | 0.90 μWh·cm <sup>-2</sup>  | 32.73 μW·cm <sup>-2</sup>  | Our  |
| CoOH <sub>2</sub> -erGO              | PVA-KOH-KI                           | Asymmetric | 2.28 mF·cm <sup>-2</sup> (0.05mA·cm <sup>-2</sup> ) [1.4V]   | 0.34 μWh·cm <sup>-2</sup>  | 100.38 μW·cm <sup>-2</sup> | Our  |
| CoOH <sub>2</sub> -CoOH <sub>2</sub> | 1M KOH                               | Symmetric  | 137.71 mF·cm <sup>-2</sup> (0.16mA·cm <sup>-2</sup> ) [0.8V] | 12.24 μWh·cm <sup>-2</sup> | 65.47 μW·cm <sup>-2</sup>  | Our  |
| CoOH <sub>2</sub> -erGO              | 1M KOH                               | Asymmetric | 43.55 mF·cm <sup>-2</sup> (0.82mA·cm <sup>-2</sup> ) [1.4V]  | 11.85 μWh·cm <sup>-2</sup> | 572.83 μW·cm <sup>-2</sup> | Our  |
| PANI-MnO <sub>x</sub>                | PVA-H <sub>2</sub> SO <sub>4</sub>   | Symmetric  | 94.73 mF·cm <sup>-2</sup> (0.1mA·cm <sup>-2</sup> ) [0.7V]   | 6.3 μWh·cm <sup>-2</sup>   | 35 μW·cm <sup>-2</sup>     | [51] |
| MnO <sub>2</sub>                     | PVA-H <sub>2</sub> SO <sub>4</sub>   | Symmetric  | ~15 F·cm <sup>-3</sup> (5mV·s <sup>-1</sup> ) [0.8V]         | 50 μWh·cm <sup>-3</sup>    | 3.4 μW·cm <sup>-3</sup>    | [52] |
| PPyGO-RuO <sub>2</sub>               | PVA-KOH-KSCN                         | Symmetric  | 26.250 mF·cm <sup>-2</sup> [1.0V]                            | 3.6 μWh·cm <sup>-2</sup>   | 1.3125 mW·cm <sup>-2</sup> | [53] |
| GF/MWNT-COOH/MnO <sub>x</sub>        | PVA-H <sub>3</sub> PO <sub>4</sub>   | Symmetric  | 0.27 mF·cm <sup>-2</sup> (2V·s <sup>-1</sup> ) [0.8V]        | -                          | -                          | [59] |
| PANI                                 | PVA-H <sub>2</sub> SO <sub>4</sub>   | Symmetric  | 67.4 mF·cm <sup>-2</sup> [0.8V]                              | -                          | -                          | [60] |
| Carbon                               | PVA-H <sub>3</sub> PO <sub>4</sub>   | Symmetric  | ~800 μF·cm <sup>-2</sup> (10 mV·s <sup>-1</sup> ) [0.8V]     | -                          | -                          | [61] |
| rGO                                  | PVA-H <sub>2</sub> SO <sub>4</sub>   | Symmetric  | 56.5 F·cm <sup>-3</sup> (0.06A·cm <sup>-3</sup> ) [1.0V]     | -                          | -                          | [62] |
| rGO                                  | PVA-H <sub>3</sub> PO <sub>4</sub>   | Symmetric  | 0.95 mF·cm <sup>-2</sup> (0.43 mA·cm <sup>-2</sup> ) [0.8V]  | -                          | -                          | [63] |
| MnO <sub>2</sub> -AC                 | 0.1M Na <sub>2</sub> NO <sub>3</sub> | Asymmetric | 30 mF·cm <sup>-2</sup> (20 mV·s <sup>-1</sup> ) [1.5V]       | -                          | -                          | [64] |
| GQD                                  | 0.5M Na <sub>2</sub> SO <sub>4</sub> | Symmetric  | 468.1 μF·cm <sup>-2</sup> (15μA·cm <sup>-2</sup> ) [1.0V]    | 0.154 μWh·cm <sup>-2</sup> | 56.7 μW·cm <sup>-2</sup>   | [54] |
| SiNWs                                | PYR <sub>13</sub> TFSI               | Symmetric  | 23.42 μF·cm <sup>-2</sup> (1mA·cm <sup>-2</sup> ) [4.0V]     | 0.053 μWh·cm <sup>-2</sup> | 182 mW·cm <sup>-2</sup>    | [55] |
| SiNWs                                | EMI-TFSI                             | Symmetric  | 440 μF·cm <sup>-2</sup> (100μA) [4.0V]                       | 0.059 μWh·cm <sup>-2</sup> | 472 μW·cm <sup>-2</sup>    | [56] |
| RuO <sub>2</sub> /CNT                | 0.1M Na <sub>2</sub> SO <sub>4</sub> | Symmetric  | 37.23 mF·cm <sup>-2</sup> [1.0V]                             | 3.07 μWh·cm <sup>-2</sup>  | 19.04 mW·cm <sup>-2</sup>  | [50] |
| Carbide derived carbon               | 1M NEt <sub>4</sub> BF <sub>4</sub>  | Symmetric  | 1.5 mF·cm <sup>-2</sup> (100 mV·s <sup>-1</sup> ) [2.0V]     | 0.83 μWh·cm <sup>-2</sup>  | 84 mW·cm <sup>-2</sup>     | [57] |
| VN/NiO                               | 1M KOH                               | Asymmetric | 1.38 mF·cm <sup>-2</sup> (1.6mA·cm <sup>-2</sup> ) [1.3V]    | 1.0 μWh·cm <sup>-2</sup>   | 40 mW·cm <sup>-2</sup>     | [58] |

**Table S1.** Summary of performances of in-plane micro supercapacitor.
